# Supplementary material for: Fast ultraviolet detection response achieved in high-quality Cs3Bi2Br9 single crystals grown by an improved anti-solvent method
Source: Royal Society of Chemistry journal article supplement (doi:10.1039/d4tc00387j), 2024-01-01
Supplement: d4tc00387j1.pdf [file d4tc00387j1.pdf]

## Supporting Information

### Fast ultraviolet detection response achieved in high-quality $\text{Cs}_3\text{Bi}_2\text{Br}_9$ single crystals grown by an improved anti-solvent method

Tianyu Wang,<sup>‡a</sup> Shuwen Xin,<sup>‡a</sup> Yaoyu Liu,<sup>a</sup> Zongshuai Ji,<sup>a</sup> Guanfeng Liu,<sup>a</sup> Shuai Zhang,<sup>a</sup> Tianhua Wang,<sup>a</sup> Fengyun Wang,<sup>\*a</sup> Bing Teng<sup>\*a</sup> and Shaohua Ji<sup>\*a, b, †</sup>

<sup>‡a</sup>College of Physics, Qingdao University, Qingdao 266071, China

<sup>†b</sup>University-Industry Joint Center for Ocean Observation and Broadband Communication, Qingdao University, Qingdao 266071, China.

#### Corresponding Authors

**Fengyun Wang**, E-mail: fywang@qdu.edu.cn

**Bing Teng**, E-mail: 5108tb@163.com

**Shaohua Ji**, E-mail: jesohua@163.com

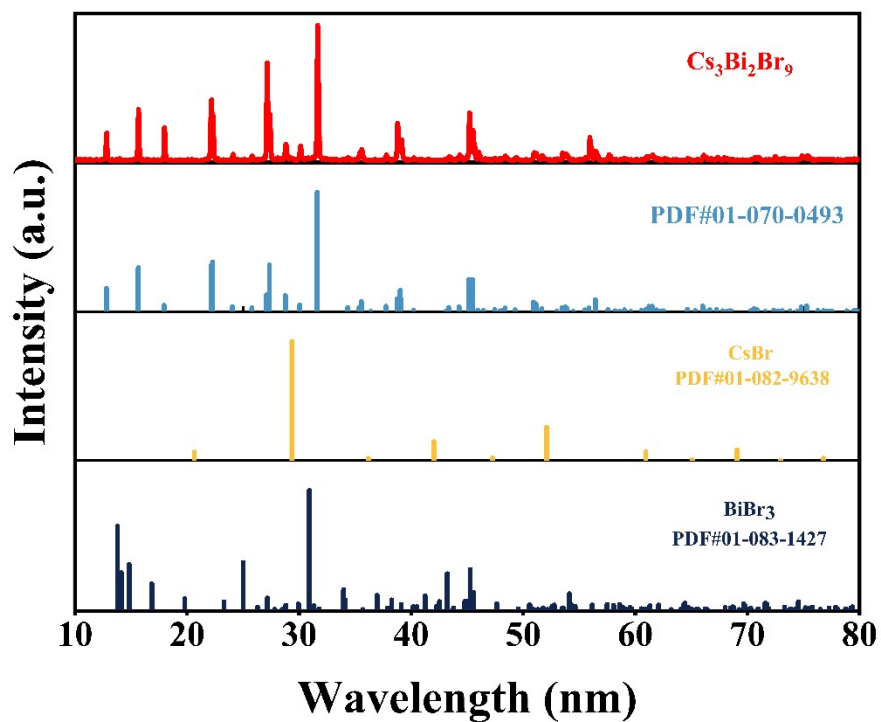

**Figure S1.** XRD pattern of  $\text{Cs}_3\text{Bi}_2\text{Br}_9$  single crystal and experimental material.

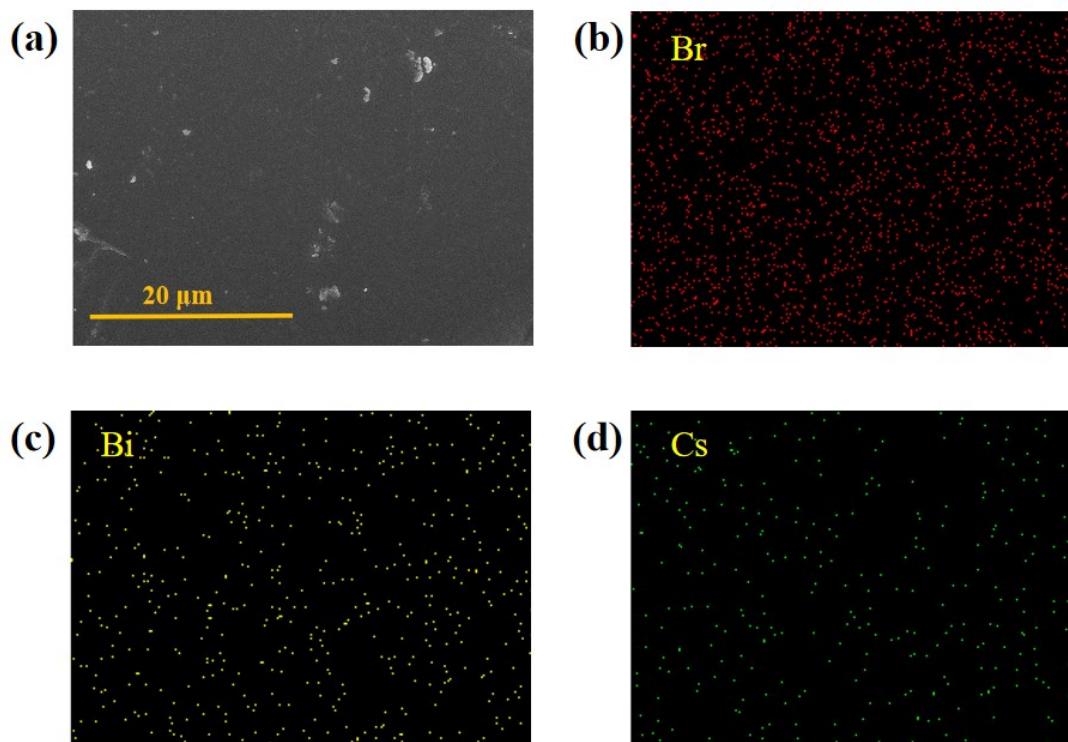

**Figure S2.** SEM image and (b-d) EDS elemental mappings (Br, Bi, Cs) of  $\text{Cs}_3\text{Bi}_2\text{Br}_9$  single crystal.

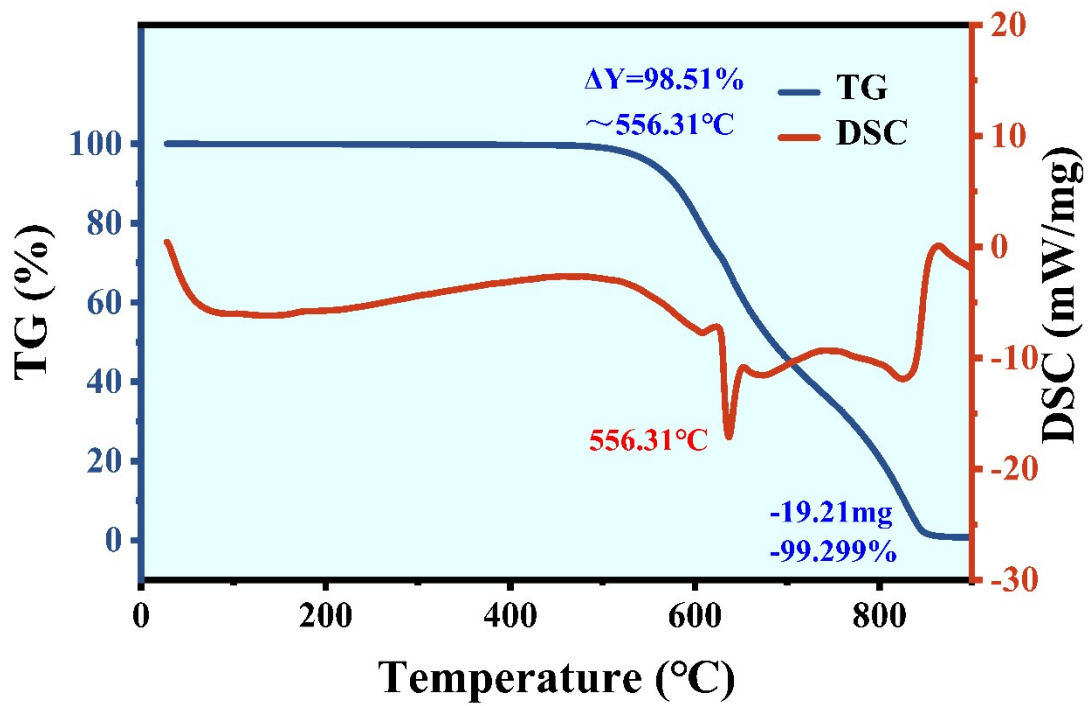

Figure S3. TG-DTA curve of  $\text{Cs}_3\text{Bi}_2\text{Br}_9$  single crystal.

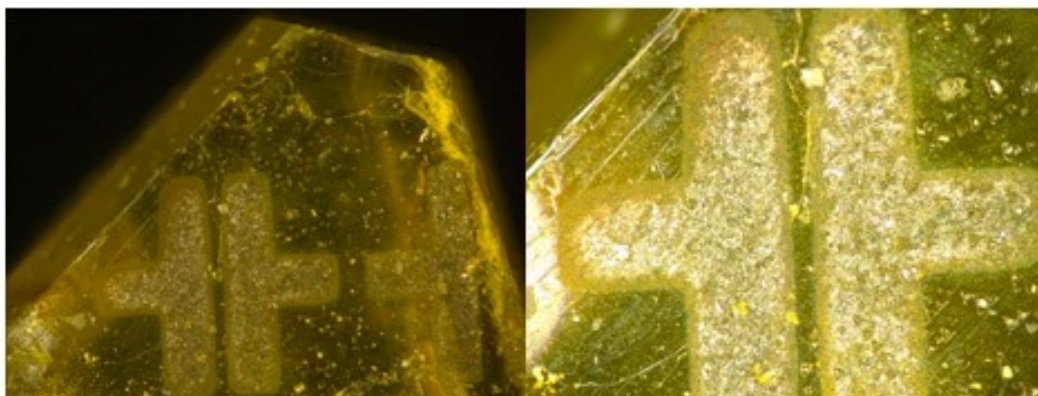

Figure S4. Device surface images under 50-fold and 100-fold microscopes.

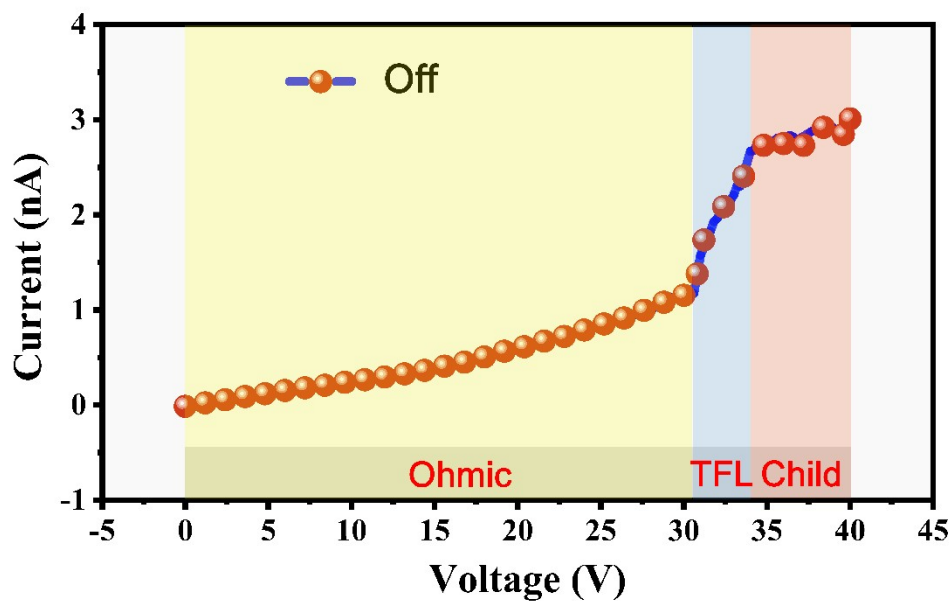

**Figure S5.**  $I \approx V^n$  curve based on  $\text{Cs}_3\text{Bi}_2\text{Br}_9$  single crystal wafer.

**Table S1.** Comparison of the characteristic parameters of  $\text{Cs}_3\text{Bi}_2\text{Br}_9$  single crystal photodetector and other UV-photodetector devices.

| Material                                             | $\lambda$ (nm) | Detectivity (jones)   | References |
|------------------------------------------------------|----------------|-----------------------|------------|
| $\text{CH}_3\text{NH}_3\text{PbCl}_3$ single crystal | 365            | $1.2 \times 10^{10}$  | 1          |
| $\text{Cs}_2\text{AgInCl}_6$ single crystal          | 365            | $10^{12}$             | 2          |
| $\text{MAPbCl}_3$ quantum dots                       | 390            | $6.07 \times 10^{11}$ | 3          |
| $\text{CsPbCl}_3$ microcrystal films                 | 365            | $5.6 \times 10^{12}$  | 4          |
| $\text{Cs}_3\text{Bi}_2\text{Br}_9$ single crystal   | 375            | $5.9 \times 10^{12}$  | This work  |

1. G. Maculan, A. D. Sheikh, A. L. Abdelhady, M. I. Saidaminov, M. A. Haque, B. Murali, E. Alarousu, O. F. Mohammed, T. Wu and O. M. Bakr, *J. Phys. Chem. C.*, 2015, **6**, 3781-3786.
2. J. Luo, S. Li, H. Wu, Y. Zhou, Y. Li, J. Liu, J. Li, K. Li, F. Yi, G. Niu and J. Tang, *ACS Photonics*, 2017, **5**, 398-405.

3. L. Cui, J. Peng, W. Li, Y. Xu, M. Zheng and Q. Lin, *Phys. Status Solidi*, 2020, **14**, 1900653.
4. Z. Zhu, W. Deng, W. Li, F. Chun, C. Luo, M. Xie, B. Pu, N. Lin, B. Gao and W. Yang, *Adv. Mater. Interfaces*, 2021, **8**, 2001812.
